# Supplementary material for: Sociodemographic Factors related to Financial Toxicity among Cancer Patients and Survivors:“The Second Cancer Patient Experience Survey” — A Nationwide Study in Japan
Source: Research Square preprint supplement (doi:10.21203/rs.3.rs-7919885/v1), 2025-11-24
Supplement: Supplementary file 1 [file 1d7dec5891981e7277678b2b.pdf]

## Supplementary material 2

Table S3. Prevalence ratio and 95% CIs for each FT category compared to “no FT” (male)

|                                                | FT_Life |              | FT_Tx  |              | FT_DisTx |              |
|------------------------------------------------|---------|--------------|--------|--------------|----------|--------------|
|                                                | PR      | 95%CI        | PR     | 95%CI        | PR       | 95%CI        |
| <b>Cancer type</b>                             |         |              |        |              |          |              |
| Colon                                          | 1.31**  | 1.11 to 1.55 | 2.13** | 1.33 to 3.41 | 1.76*    | 1.05 to 2.98 |
| Lung                                           | 1.21*   | 1.02 to 1.45 | 1.13   | 0.63 to 2.04 | 2.02**   | 1.29 to 3.16 |
| Stomach                                        | 1.11    | 0.91 to 1.35 | 1.30   | 0.71 to 2.39 | 1.37     | 0.81 to 2.29 |
| Prostate                                       | 0.94    | 0.74 to 1.18 | 2.63** | 1.45 to 4.77 | 1.68     | 0.96 to 2.93 |
| Malignant lymphoma/leukemia                    | 1.35*   | 1.07 to 1.69 | 2.97** | 1.58 to 5.58 | 1.16     | 0.53 to 2.52 |
| Other                                          | 1.04    | 0.89 to 1.22 | 1.62   | 0.98 to 2.67 | 1.44     | 0.91 to 2.28 |
| <b>Treatment status (ref: after treatment)</b> |         |              |        |              |          |              |
| During treatment                               | 1.38**  | 1.17 to 1.63 | 1.99** | 1.29 to 3.05 | 2.31**   | 1.42 to 3.75 |
| No treatment, death/other                      | 0.94    | 0.74 to 1.19 | 0.42   | 0.18 to 1.02 | 1.64     | 0.81 to 3.33 |
| <b>Treatment type</b>                          |         |              |        |              |          |              |
| Surgery                                        | 1.13    | 0.98 to 1.30 | 1.30   | 0.82 to 2.05 | 0.98     | 0.64 to 1.50 |
| Chemotherapy                                   | 1.24**  | 1.07 to 1.43 | 0.92   | 0.56 to 1.53 | 0.62*    | 0.40 to 0.98 |
| Radiotherapy                                   | 1.17*   | 1.02 to 1.35 | 1.47   | 0.96 to 2.24 | 1.08     | 0.73 to 1.61 |
| Other                                          | 1.01    | 0.89 to 1.16 | 0.98   | 0.65 to 1.47 | 0.75     | 0.50 to 1.13 |
| <b>Age (ref: 65+)</b>                          |         |              |        |              |          |              |
| 40-64                                          | 1.27**  | 1.07 to 1.51 | 1.59   | 0.90 to 2.81 | 1.22     | 0.73 to 2.04 |
| <40                                            | 1.98**  | 1.54 to 2.56 | 3.29** | 1.56 to 6.96 | 2.26     | 0.98 to 5.23 |
| <b>Employment status (ref: full-time)</b>      |         |              |        |              |          |              |
| Self-employed                                  | 1.06    | 0.84 to 1.33 | 2.63*  | 1.25 to 5.55 | 1.81     | 0.92 to 3.54 |
| Part-time                                      | 1.05    | 0.85 to 1.30 | 2.47*  | 1.22 to 4.96 | 1.65     | 0.85 to 3.21 |
| Unemployed                                     | 1.40    | 0.52 to 3.83 | 1.44   | 0.25 to 8.17 | 0.57     | 0.06 to 5.06 |

|                                                                |        |              |       |               |        |               |
|----------------------------------------------------------------|--------|--------------|-------|---------------|--------|---------------|
| <b>Actions taken due to treatment</b> (ref: continued working) |        |              |       |               |        |               |
| Paid leave                                                     | 1.43*  | 1.09 to 1.88 | 2.20  | 0.93 to 5.23  | 2.61*  | 1.17 to 5.80  |
| Unpaid leave                                                   | 1.87** | 1.42 to 2.45 | 2.61* | 1.15 to 5.92  | 2.22   | 0.99 to 4.93  |
| Resigned                                                       | 2.05** | 1.55 to 2.71 | 3.15* | 1.29 to 7.71  | 2.32   | 0.98 to 5.45  |
| Unknown                                                        | 1.18   | 1.18 to 2.45 | —     | —             | 2.24   | 0.47 to 10.80 |
| Unemployed                                                     | 1.09   | 0.40 to 3.01 | 2.17  | 0.39 to 12.04 | 3.39   | 0.35 to 32.33 |
| <b>Presence of someone to talk to</b> (ref: yes)               |        |              |       |               |        |               |
| No                                                             | 1.49** | 1.17 to 1.89 | 2.01* | 1.07 to 3.75  | 2.04*  | 1.05 to 3.94  |
| No need                                                        | 0.86   | 0.73 to 1.02 | 0.47* | 0.24 to 0.93  | 0.54*  | 0.30 to 0.99  |
| N/A                                                            | 0.69   | 0.50 to 0.96 | 0.51  | 0.13 to 1.99  | 0.92   | 0.42 to 2.05  |
| <b>Feeling alienated</b> (ref: low)                            |        |              |       |               |        |               |
| Intermediate                                                   | 1.35** | 1.11 to 1.65 | 1.30  | 0.73 to 2.31  | 1.11   | 0.67 to 1.85  |
| High                                                           | 1.44** | 1.13 to 1.85 | 1.74  | 0.87 to 3.46  | 0.99   | 0.49 to 2.01  |
| <b>Perceived prejudice</b> (ref: low)                          |        |              |       |               |        |               |
| Intermediate                                                   | 1.33** | 1.12 to 1.58 | 1.74* | 1.08 to 2.82  | 1.35   | 0.73 to 2.49  |
| High                                                           | 1.69** | 1.28 to 2.24 | 2.11  | 0.91 to 4.88  | 4.59** | 2.31 to 9.12  |

---

\*p<0.05    \*\*<0.01

Abbreviation: FT\_DsTx, FT led to treatment change or discontinuation. FT\_Tx, FT impacted on treatment-receiving behavior. FT\_Life, FT impacted on daily life. N/A, Not Applicable (Questions restricted to patients themselves were marked as “N/A” if answered by a non-patient, such as family)

Table S4. Prevalence ratio and 95% CIs for each FT category compared to “no FT” (female)

|                                                | FT_Life |              | FT_Tx  |              | FT_DisTx |              |
|------------------------------------------------|---------|--------------|--------|--------------|----------|--------------|
|                                                | PR      | 95%CI        | PR     | 95%CI        | PR       | 95%CI        |
| <b>Cancer type</b>                             |         |              |        |              |          |              |
| Colon                                          | 1.28*   | 1.03 to 1.58 | 1.01   | 0.44 to 2.32 | 0.74     | 0.35 to 1.59 |
| Lung                                           | 1.06    | 0.85 to 1.32 | 0.57   | 0.21 to 1.56 | 0.77     | 0.37 to 1.62 |
| Stomach                                        | 1.10    | 0.85 to 1.43 | 1.72   | 0.74 to 4.01 | 0.90     | 0.41 to 1.98 |
| Breast                                         | 1.13    | 0.90 to 1.42 | 2.51*  | 1.22 to 5.18 | 0.74     | 0.34 to 1.61 |
| Cervix/uterus, Ovary                           | 1.39**  | 1.14 to 1.71 | 1.88*  | 1.02 to 3.44 | 0.92     | 0.44 to 1.96 |
| Malignant lymphoma/leukemia                    | 1.50**  | 1.16 to 1.94 | 2.24   | 0.86 to 5.84 | 0.89     | 0.32 to 2.45 |
| Other                                          | 1.20    | 0.99 to 1.46 | 1.78   | 0.96 to 3.31 | 0.99     | 0.53 to 1.89 |
| <b>Treatment status</b> (ref: after treatment) |         |              |        |              |          |              |
| During treatment                               | 1.30**  | 1.12 to 1.51 | 1.29   | 0.83 to 1.99 | 1.28     | 0.72 to 2.29 |
| No treatment, death/other                      | 1.06    | 0.78 to 1.45 | 0.37   | 0.12 to 1.12 | 1.40     | 0.65 to 3.02 |
| <b>Treatment type</b>                          |         |              |        |              |          |              |
| Surgery                                        | 1.17    | 0.96 to 1.42 | 1.03   | 0.53 to 2.00 | 1.41     | 0.74 to 2.66 |
| Chemotherapy                                   | 1.34**  | 1.17 to 1.53 | 0.89   | 1.61 to 1.30 | 1.15     | 0.77 to 1.72 |
| Radiotherapy                                   | 1.16*   | 1.02 to 1.33 | 0.85   | 0.59 to 1.24 | 0.83     | 0.53 to 1.31 |
| Other                                          | 0.86    | 0.73 to 1.00 | 1.72*  | 1.07 to 2.75 | 1.06     | 0.66 to 1.73 |
| <b>Age</b> (ref: 65+)                          |         |              |        |              |          |              |
| 40-64                                          | 1.20*   | 1.01 to 1.43 | 3.34** | 1.92 to 5.81 | 1.14     | 0.67 to 1.95 |
| >40                                            | 1.40**  | 1.14 to 1.70 | 3.58** | 1.95 to 6.57 | 1.79*    | 1.01 to 3.17 |
| <b>Employment status</b> (ref: full-time)      |         |              |        |              |          |              |
| Self-employed                                  | 0.79    | 0.57 to 1.09 | 1.05   | 0.42 to 2.58 | 0.79     | 0.17 to 3.67 |
| Part-time                                      | 0.95    | 0.80 to 1.13 | 1.74*  | 1.06 to 2.88 | 2.49*    | 1.18 to 5.24 |

|                                                                |        |              |        |               |       |               |
|----------------------------------------------------------------|--------|--------------|--------|---------------|-------|---------------|
| Unemployed                                                     | 0.58   | 0.28 to 1.21 | 0.84   | 0.08 to 8.58  | 0.94  | 0.16 to 5.59  |
| <b>Actions taken due to treatment</b> (ref: continued working) |        |              |        |               |       |               |
| Paid leave                                                     | 1.20   | 0.93 to 1.55 | 0.74   | 0.36 to 1.51  | 1.36  | 0.51 to 3.62  |
| Unpaid leave                                                   | 1.37*  | 1.04 to 1.82 | 1.21   | 0.60 to 2.46  | 1.97  | 0.71 to 5.40  |
| Resigned                                                       | 1.33*  | 1.01 to 1.74 | 1.20   | 0.59 to 2.45  | 1.37  | 0.49 to 3.85  |
| Unknown                                                        | 0.68   | 0.24 to 1.95 | 1.96   | 0.42 to 9.13  | 1.20  | 0.14 to 10.54 |
| Unemployed                                                     | 1.69   | 0.79 to 3.63 | 1.50   | 0.15 to 15.09 | 3.04  | 0.46 to 20.25 |
| <b>Presence of someone to talk to</b> (ref: yes)               |        |              |        |               |       |               |
| None                                                           | 1.38** | 1.12 to 1.70 | 2.54** | 1.57 to 4.12  | 2.07* | 1.09 to 3.93  |
| No need                                                        | 0.72   | 0.57 to 0.91 | 0.52   | 0.24 to 1.12  | 0.46* | 0.23 to 0.94  |
| N/A                                                            | 0.75   | 0.53 to 1.06 | 1.72   | 0.75 to 3.92  | 0.56  | 0.23 to 1.39  |
| <b>Feeling alienated</b> (ref: low)                            |        |              |        |               |       |               |
| Intermediate                                                   | 1.17   | 0.99 to 1.37 | 1.63*  | 1.03 to 2.56  | 0.74  | 0.43 to 1.28  |
| High                                                           | 1.56** | 1.28 to 1.89 | 3.05** | 1.82 to 5.12  | 1.61  | 0.85 to 3.08  |
| <b>Perceived prejudice</b> (ref: low)                          |        |              |        |               |       |               |
| Intermediate                                                   | 1.31** | 1.12 to 1.52 | 1.25   | 0.82 to 1.89  | 0.95  | 0.52 to 1.72  |
| High                                                           | 1.51** | 1.22 to 1.86 | 1.80   | 1.06 to 3.05  | 1.84  | 0.95 to 3.58  |

\*p<0.05    \*\*<0.01

Abbreviation: FT\_DsTx, FT led to treatment change or discontinuation. FT\_Tx, FT impacted on treatment-receiving behavior. FT\_Life, FT impacted on daily life. N/A, Not Applicable (Questions restricted to patients themselves were marked as “N/A” if answered by a non-patient, such as family)
